# Supplementary material for: The Differential Antitumor Activity of 5-Aza-2'-deoxycytidine in Prostate Cancer DU145, 22RV1, and LNCaP Cells
Source: PubMed Central journal article supplement (PMC8364635; doi:10.7150/jca.56709), 2021-07-25
Supplement: jcav12p5593s1.pdf [file jcav12p5593s1.pdf]

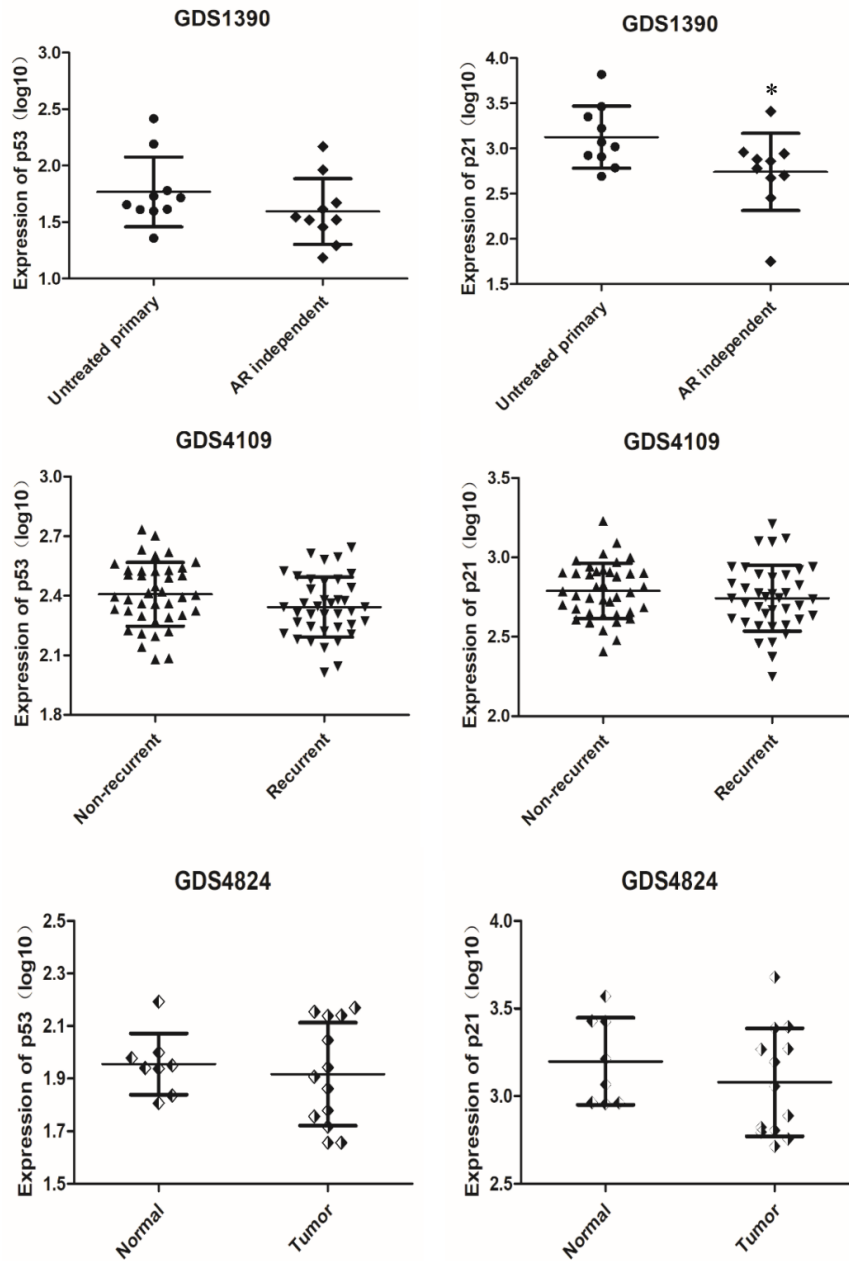

**Supplementary Figure 1. Bioinformatics analysis of p53 and p21 expression in human prostate cancer tissues.** Data were extracted from NCBI GEO profiles dataset. The bars denote the mean  $\pm$  SD, \*  $P < 0.05$ .
